# Supplementary material for: Transfer Student Experiences and Identity Navigation in STEM: Overlapping Figured Worlds of Success
Source: Atypon-hosted journal article supplement (doi:10.1187/cbe.20-06-0121), 2021-08-23
Supplement: combinedsupmats.pdf [file combinedsupmats.pdf]

# Supplemental Material

CBE—Life Sciences Education

Zuckerman and Lo

**Transfer student experiences and identity navigation in STEM: Examining the community college to university transition using figured worlds**

Supplemental material

Austin L. Zuckerman<sup>1</sup>, Stanley M. Lo<sup>1,2,3\*</sup>

<sup>2</sup>Section of Cell and Developmental Biology, <sup>1</sup>Division of Biological Sciences and

<sup>3</sup>Program in Mathematics and Science Education, University of California San Diego

\*Corresponding author:

Stanley M. Lo

9500 Gilman Drive #0355

La Jolla, CA 92093-0355

Email: [smlo@ucsd.edu](mailto:smlo@ucsd.edu)

Phone: (858)246-1087

## **Interview protocol**

Thank you for participating in this interview. The interview will be confidential. We will remove any identifiers before sharing any information with the summer bridge program faculty or publishing the results. If you feel uncomfortable at any time in the interview, please let me know, and we can stop.

### Figured worlds

1. How would you define success as a student in your major here at [the university]?
  - a. In your view, what makes a successful student?
  - b. In your view, what does a successful student do?
  - c. Can you give a specific example?
  - d. Did your definition of success change in this regard over the last two years since you have been here?
  - e. How? Why?
  
2. How do you think your family would define success for you at [the university]?
  - a. What are their expectations for you at the university?
  - b. What are their expectations for you after you graduate?
  
3. How do you think [university] faculty would define success as a [university] student?
  - a. In your view, what do students do that gets recognized by faculty as being successful?

4. Thinking back to when you were at your community college or colleges that you attended, how would you define success as a student in your major there?
  - a. In your view, what makes a successful student in that college?
  - b. In your view, what does a successful student do in that college?
  - c. Can you give a specific example?
  
5. Thinking back to when you were at your high school or high schools that you attended, how would you define success as a student there?
  - a. In your view, what makes a successful student in that high school?
  - b. In your view, what does a successful student do in that high school?
  - c. Can you give a specific example?
